# Supplementary material
Source: PubMed Central journal article supplement (PMC5828585)
Supplement: pnas.1713912115.sapp.pdf [file pnas.1713912115.sapp.pdf]

# Supporting information

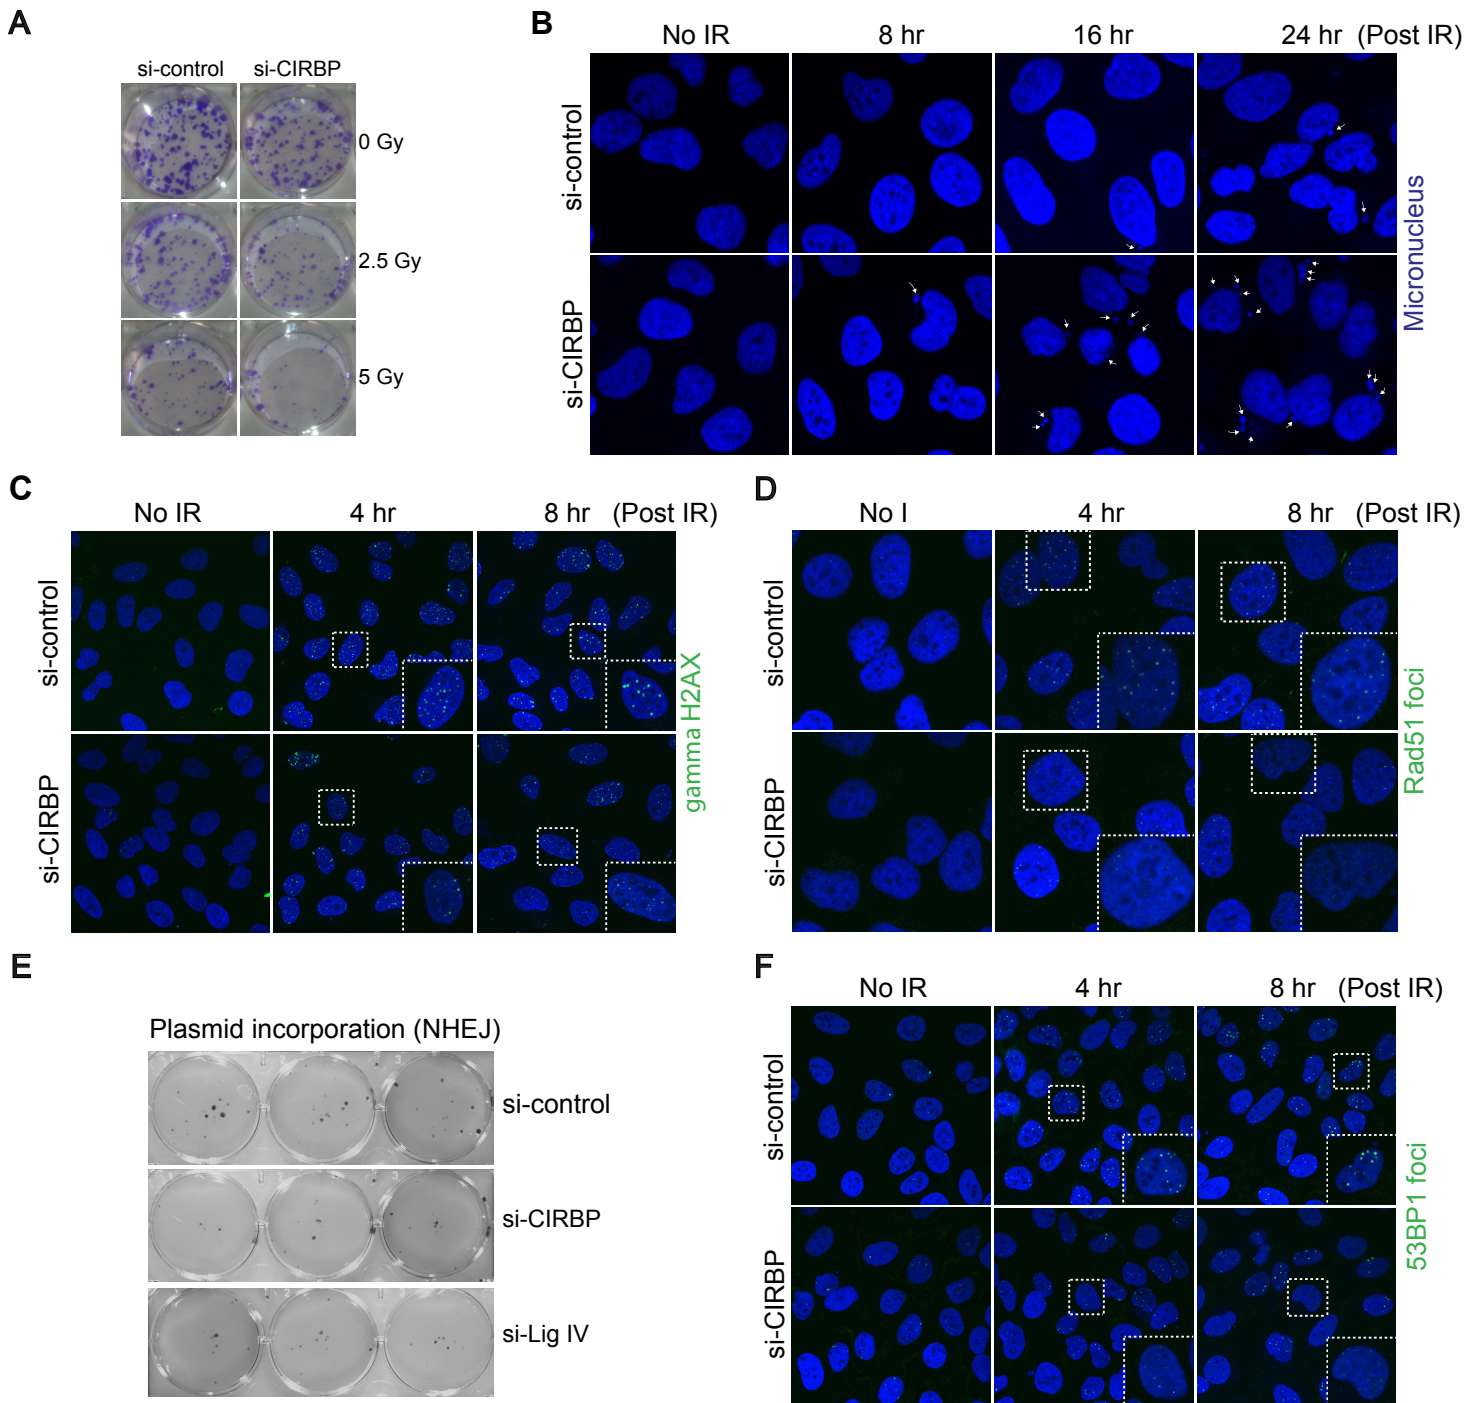

**Fig. S1.** CIRBP promotes genome stability and double-strand breaks repair, data are Fig 1 related. (A) CIRBP depletion increases irradiation (IR) sensitivity. The results show representative images from the experiment shown in Fig. 1A. (B) CIRBP-depletion increases IR-induced micronuclei formation. The results show representative images from the experiment described in Fig. 1B. Associated micronuclei are indicated with white arrows. (C) CIRBP-depletion reduces nuclear  $\gamma$ H2AX intensity. The results show representative images from the experiment shown in Fig. 1C.  $\gamma$ H2AX is shown in green, counterstain with DAPI in blue. Inserts represent a zoom-in image to highlight  $\gamma$ H2AX foci (boxed region) (D) CIRBP-depletion reduces IR-induced Rad51 foci formation. The results show representative images from the experiment described in Fig. 1E. Rad 51 was stained with green and merged with nucleus counterstained with DAPI. Inserts represent a zoom-in image to highlight Rad51 foci (boxed region) (E) CIRBP-knockdown reduces non-homologous end joining (NHEJ). NHEJ efficiency was determined by random plasmid incorporation assay. The results show representative images from the experiment shown in Fig. 1F. (F) CIRBP-depletion reduces IR-induced 53BP1 foci formation. The results show representative images from the experiment described in Fig. 1G. 53BP1 is shown in green, counterstained with DAPI in blue. Inserts represent a zoom-in image to highlight 53BP1 foci (boxed region)







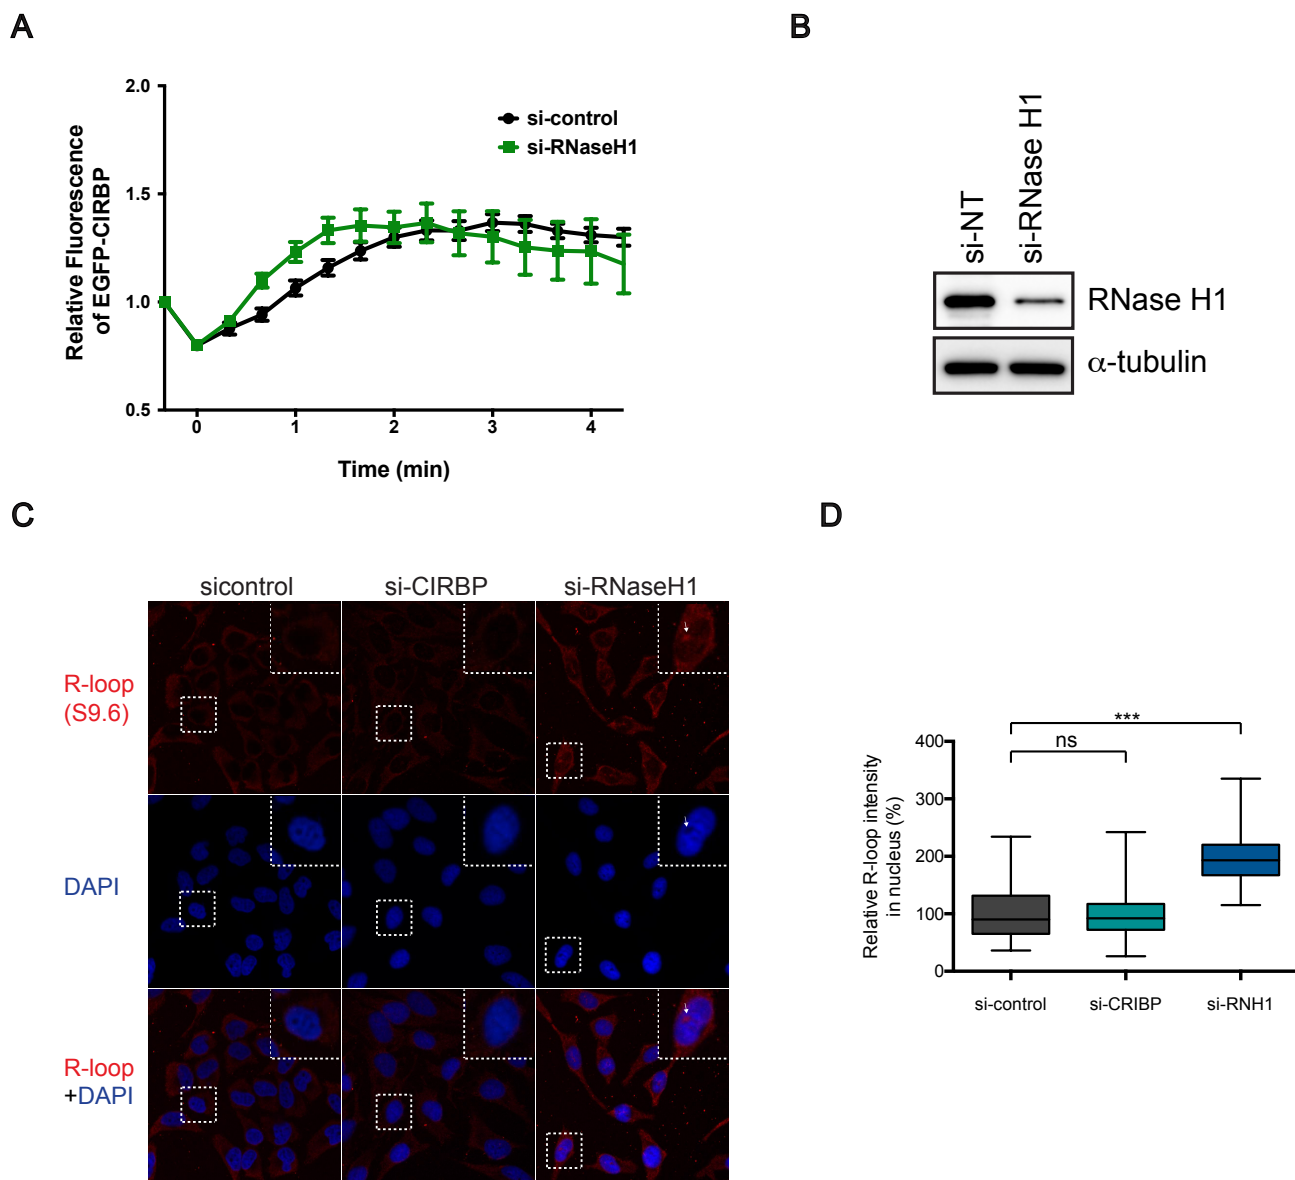

**Fig. S5.** Relationship between CIRBP and DNA/RNA hybrid (R-loop) (A) R-loop is not responsible for the recruitment of CIRBP to the laser microirradiated regions. EGFP-CIRBP overexpressed U2OS cells were transfected with non-targeting, RNaseH1 siRNA, and then subjected to laser microirradiation assay. (B) RNase H1 knock-down efficiency in U2OS cell line using siRNA. (C) CIRBP knockdown does not affect R-loop level in nucleus. HeLa cells were transfected with non-targeting, CIRBP and RNaseH1 siRNA, fixed and stained with R-loop (S9.6) antibodies. Cells were then counterstained with DAPI and the nuclear R-loop intensity was analyzed by Fiji ImageJ. Inserts represent a zoom-in image to highlight a single cell (boxed region). The white arrow indicates nucleolus. (D) Quantification of results in Fig S7C. The data are presented as median, 25<sup>th</sup> to 75<sup>th</sup> centile range (boxes) and minimum to maximum centile range (whiskers) from two independent experiments. ns, no significant difference, \*\*\* $P < 0.001$  (Mann-Whitney  $U$  test).



**A**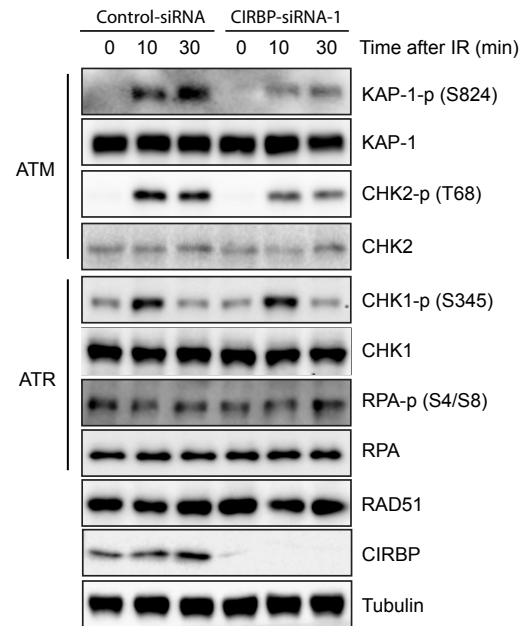

**Fig. S6.** CIRBP-depletion specifically affects ATM signalling. (A) Control or CIRBP siRNA treated U2OS cells were exposed to either 5 Gy IR or none. The total cell lysates were prepared using Laemmli buffer and subjected to immunoblotting against indicated antibodies.

**A**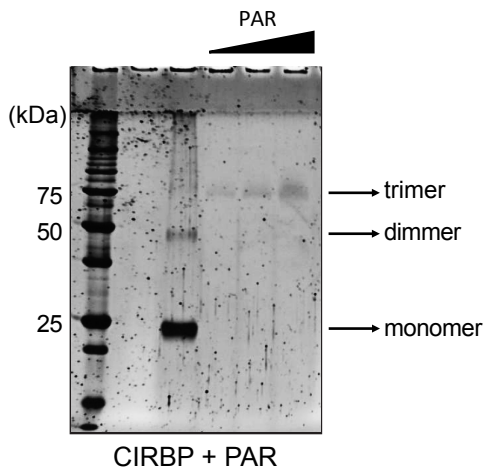**B**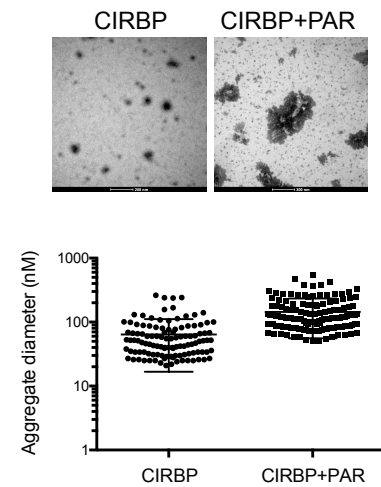

**Fig. S7.** PAR polymer facilitates CIRBP aggregation *in vitro*. (A) Poly(ADP-ribose) triggers CIRBP protein to form aggregates. Recombinant His-tagged CIRBP was incubated with or without purified PAR polymer and crosslinked in 0.4% formaldehyde for 15 min. The reaction mixture was analyzed by SDS electrophoresis and stained with SYPRO Ruby solution. (B) CIRBP aggregates detected by transmission electron microscopy (TEM). Recombinant full-length CIRBP was incubated with or without sub-stoichiometric amount of purified PAR polymer and the CIRBP aggregates were analyzed by TEM. The data are presented as mean  $\pm$  SD.

**Table S1. Antibodies**

| Names                                | Sources           | Catalog #      | Clone #  | Applications |
|--------------------------------------|-------------------|----------------|----------|--------------|
| PARP-1                               | Santa Cruz        | sc-8007        | F2       | WB           |
| CIRBP                                | Proteintech       | 10209-2-AP     |          | WB, IF       |
| CIRBP                                | Abcam             | ab191885       | EPR18783 | WB, IF       |
| ATM                                  | Santa Cruz        | sc-135663      | 1B10     | WB           |
| ATM (phospho S1981)                  | R&D               | AF1655         |          | WB, ChIP     |
| ATM (phospho S1981)                  | Abcam             | ab81292        | EP1890Y  | WB           |
| ATR                                  | Bethyl            | A300-137A      |          | WB           |
| DNA-PK                               | Cell Signalling   | 4602           |          | WB           |
| Histone 3                            | Abcam             | ab1791         |          | WB           |
| $\beta$ -Tubulin                     | Abcam             | ab6046         |          | WB           |
| GFP                                  | Invitrogen        | A11122         |          | WB, IF       |
| Flag                                 | Sigma             | F1804          | M2       | WB           |
| H2AX                                 | Cell Signalling   | 2595           |          | WB           |
| $\gamma$ H2AX (phospho S139)         | Novus Biologicals | NB100-384      |          | WB, IF       |
| PAR                                  | Trevigen          | 4335-MC-100-AC | 10H      | WB           |
| Mre11                                | Genetex           | GTX70212       | 12D7     | WB           |
| Rad50                                | Genetex           | GTX70228       | 13B3     | WB           |
| NBS1                                 | Genetex           | GTX70222       | 1C3      | WB, ChIP     |
| KAP1                                 | Cell Signalling   | 4124T          | C42G12   | WB           |
| KAP1 (phospho S824)                  | Cell Signalling   | 4127T          |          | WB           |
| phospho-(S/T)ATM/ATR substrate       | Cell Signalling   | 2851           |          | WB           |
| CHK2                                 | Cell Signalling   | 3440T          | C12      | WB           |
| CHK2 (phospho T68)                   | Cell Signalling   | 2197T          | C13C1    | WB           |
| RPA32                                | Abcam             | ab2175         | 9H8      | WB           |
| RPA32 (phospho S4/8)                 | Bethyl            | A300-245A      |          | WB           |
| CHK1                                 | Santa Cruz        | sc-8408        | G-4      | WB           |
| CHK1 (phospho S345)                  | Cell Signalling   | 2348           | 133D3    | WB           |
| RNase H1                             | Proteintech       | 15606-1-AP     |          | WB           |
| DNA/RNA hybrid [S9.6]                | kerafast          | ENH001         |          | IF           |
| Anti-mouse IgG-HRP                   | Sigma             | A4416          |          | WB           |
| Anti-Rabbit IgG-HRP                  | Cell Signalling   | 70743          |          | WB           |
| Alexa Fluor 488 goat anti-mouse IgG  | Invitrogen        | A11029         |          | IF           |
| Alexa Fluor 647 goat anti-mouse IgG  | Invitrogen        | A21236         |          | IF           |
| Alexa Fluor 488 goat anti-rabbit IgG | Invitrogen        | A11034         |          | IF           |
| Alexa Fluor 647 goat anti-rabbit IgG | Invitrogen        | A21245         |          | IF           |



**Table S2. Plasmid constructs**

| Construct                      | Plasmid digestion         | Insert                                                                     |
|--------------------------------|---------------------------|----------------------------------------------------------------------------|
| pcDNA3-CIRBP-WT-EGFP           | pcDNA3-EGFP, BamHI+XhoI   | PCR amplified WT CIRBP (516 bp)                                            |
| pcDNA3-CIRBP-3F/A-EGFP         | pcDNA3-EGFP, BamHI+XhoI   | F15, F49, F51 mutated to A                                                 |
| pcDNA3-4R/A-EGFP               | pcDNA3-EGFP, BamHI+XhoI   | R91, R94, R116, R121 mutated to A                                          |
| pcDNA3-9R/A-EGFP               | pcDNA3-EGFP, BamHI+XhoI   | R91, R94, R101, R105, R108, R110<br>R112, R116, R121 mutated to A          |
| pcDNA3-5M-EGFP                 | pcDNA3-EGFP, BamHI+XhoI   | E23, K7A, K39, K70, K84 mutated to A                                       |
| pFastBac-CIRBP-WT-His6         | pFastBac-HT-B, BamHI+XhoI | WT CIRBP                                                                   |
| pFastBac-CIRBP-3F/A-His6       | pFastBac-HT-B, BamHI+XhoI | 3F/A CIRBP                                                                 |
| pFastBac-CIRBP-9R/A-His6       | pFastBac-HT-B, BamHI+XhoI | 9R/A CIRBP                                                                 |
| pFastBac-CIRBP-5M-His6         | pFastBac-HT-B, BamHI+XhoI | E23, K7A, K39, K70, K84 mutated to A                                       |
| siRNA resistant CIRBP-WT-TAA   | pcDNA3-mRFP, BamHI+XhoI   | WT CIRBP with gggctgagtttgacaccaat<br>to ggATTATCAttCgaTacAaaC mutations   |
| siRNA resistant CIRBP-9R/A-TAA | pcDNA3-mRFP, BamHI+XhoI   | 9R/A CIRBP with gggctgagtttgacaccaat<br>to ggATTATCAttCgaTacAaaC mutations |
| siRNA resistant CIRBP-5M-TAA   | pcDNA3-mRFP, BamHI+XhoI   | 4mt CIRBP with gggctgagtttgacaccaat<br>to ggATTATCAttCgaTacAaaC mutations  |
| pcDNA3-CIRBP-T43A-EGFP         | pcDNA3-EGFP, BamHI+XhoI   | T43A CIRBP                                                                 |
| pcDNA3-CIRBP-S146A-EGFP        | pcDNA3-EGFP, BamHI+XhoI   | S146A CIRBP                                                                |
| pcDNA3-CIRBP-T43A-S146A-EGFP   | pcDNA3-EGFP, BamHI+XhoI   | T43A+S146A CIRBP                                                           |

**Table S3. Chemicals**

| Names       | Sources     | Catalog # | Target              | Stock            | Treatment         |
|-------------|-------------|-----------|---------------------|------------------|-------------------|
| Olaparib    | Selleckchem | AZD2281   | PAR sythesis        | 2 mM / DMSO      | 1 $\mu$ M / 1 hr  |
| Etopoxide   | Sigma       | E1383     | Topoisomerase II    | 40 mM / DMSO     | 40 $\mu$ M / 1 hr |
| Tannic acid | Sigma       | 403040    | PARG                | 10 mM / water    | 10 $\mu$ M / 1 hr |
| KU55933     | Tocris      | 3544      | ATM                 | 20 mM / DMSO     | 10 $\mu$ M / 2hr  |
| VE-821      | Selleckchem | S8007     | ATR                 | 10 mM / DMSO     | 10 $\mu$ M / 2hr  |
| NU7441      | Tocris      | 3712      | DNA-PK              | 10 mM / DMSO     | 10 $\mu$ M / 2hr  |
| DRB         | Sigma       | D1916     | RNA polymerase II   | 100 mM / DMSO    | 100 $\mu$ M / 2hr |
| Shield-1    | Clontech    | 632189    | Dsstabilized domain | 500 mM / ethanol | 1 mM / 4 hr       |
| 4-OHT       | Sigma       | T176      | Estrogen receptor   | 1 mM / ethanol   | 1 $\mu$ M / 4hr   |



**Table S4. The sequences of siRNAs and qPCR primers**

| siRNA         | Sequences (with 3'-UU overhang) | qPCR primer | Sequences                                                    |
|---------------|---------------------------------|-------------|--------------------------------------------------------------|
| CIRBP         | #1: GGCUCCAGAGACUACUAUA         | PARP-1      | F: GATGGGTTCTCTGAGCTTCG                                      |
|               | #2: GGCUGAGUUUUGACACCAA         |             | R: TCTGCCTTGCTACCAATTCC                                      |
|               | #3: CAGAGACAGTTACGACAGT         |             |                                                              |
| PARP-1        | #1: CCAUCGAUGUCAACUAUGA         | PARP-2      | F: TGGGGAAGGCTCATGTGTAT<br>R: TCCTCTGGGCATCATCTTCT           |
| PARP-2        | #1: CCAUUGGACCAACACUAUA         | PARG        | F: TACACGACCCCAAACTTGA<br>R: TCCCAGAAATCGATCAAAGC            |
| PARG          | #1: GAAGAAUGCAGAAACUGUU         |             |                                                              |
| Non-targeting | #1: UGGUUUACAUGUCGACUAA         | 265-P1      | F: GGAAGATGTCCCTTGTATCACCAT<br>R: TGGTTGTCAACAGAGTAGAAAGTGAA |
|               | #2: UGGUUUACAUGUUGUGUGA         |             |                                                              |
|               | #3: UGGUUUACAUGUUUUCUGA         | 265-P2      | F: GCTGGTGTGGCCAATGC<br>R: TGGCAGAGGGAAAAAGATCTCA            |
|               | #4: UGGUUUACAUGUUUUCUA          |             |                                                              |
| Ligase IV     | #1: AGGAAGUAUUCUCAGGAAUUA       | 265-P3      | F: GGCATTTTCAGTCAGTTGCTCAA<br>R: TTGGCCGATTCATTAATGCA        |
| CtIP          | #1: GGUAAAACAGGAACGAAUC         |             |                                                              |
| Rnase H1      | #1: AAGUUUGCCACAGAGGAUGAG       | 265-P4      | F: CCACCTGACGTCTAAGAAACCAT<br>R: GATCCCTCGAGGACGAAAGG        |
|               |                                 | GAPDH       | F: GCTTGCCCTGTCCAGTTAAT<br>R: TAGCTCAGCTGCACCCTTTA           |

**Table S5. Abbreviations**

| Abbreviation | Full name                                                 |
|--------------|-----------------------------------------------------------|
| CIRBP        | Cold-inducible RNA-binding protein                        |
| PARP-1       | Poly(ADP-ribose) polymerase 1                             |
| PARG         | Poly(ADP-ribose) glycohydrolase                           |
| ATM          | Ataxia Telangiectasia Mutated                             |
| ATR          | ATM- and Rad3-related protein                             |
| CtIP         | CtBP-interacting protein                                  |
| PIKKs        | Phosphatidylinositol 3-kinase-related kinases             |
| MRN          | Mre11-Rad50-NBS1                                          |
| Mre11        | Meiotic recombination 11 homolog A                        |
| Rad50        | RAD50 homolog                                             |
| NBS1         | Nijmegen Breakage Syndrome 1 (Nibrin)                     |
| H2AX         | H2A histone family, member X                              |
| CHK1         | Checkpoint kinase 1                                       |
| CHK2         | Checkpoint kinase 2                                       |
| Rad51        | RAD51 homolog                                             |
| 53BP1        | Tumor Protein P53-Binding Protein 1                       |
| KAP-1        | KRAB [Kruppel-Associated Box Domain]-Associated Protein 1 |
| RPA          | Replication protein A2                                    |
| DNA-PK       | DNA protein kinase catalytic subunit                      |
| Ku80         | X-ray repair cross-complementing protein 5                |
| PAR          | Poly(ADP-ribose)                                          |
| RBP          | RNA-binding protein                                       |
| RRM          | RNA-recognition motif                                     |
| DSB          | Double-strand break                                       |
| HR           | Homologous recombination                                  |
| NHEJ         | Non-homologous end joining                                |
| DDR          | DNA damage response                                       |
| IR           | Ionizing radiation                                        |
| DR-GFP       | Direct repeat green fluorescence protein                  |
| ChIP         | Chromatin immunoprecipitation                             |
